# Supplementary material for: Controlling the distribution of aluminum in a Cu–zeolite catalyst by seed-assisted synthesis to improve its NH3-SCR activity
Source: Royal Society of Chemistry journal article supplement (doi:10.1039/d2cy00745b), 2022-01-01
Supplement: d2cy00745b1.pdf [file d2cy00745b1.pdf]

## Supporting information

# Controlling the Distribution of Aluminum in a Cu-Zeolite Catalyst by Seed-Assisted Synthesis to Improve its NH<sub>3</sub>-SCR Activity

*Hwangho Lee<sup>a</sup>, Jonghyun Kim<sup>b</sup>, Inhak Song<sup>a</sup>, Se Won Jeon<sup>a</sup>, Sung June Cho<sup>c</sup>, and Do Heui Kim<sup>a\*</sup>*

<sup>a</sup>School of Chemical and Biological Engineering, Institute of Chemical Processes, Seoul National University, Seoul 08826, Republic of Korea

<sup>b</sup>Corporate R&D, LG Chem R&D Campus Daejeon, 188, Daejeon 34122, Republic of Korea

<sup>c</sup>Department of Chemical Engineering, Chonnam National University, Gwangju, 61186, Republic of Korea

\*Corresponding author.

Phone: +82-2-880-1633

E-mail: dohkim@snu.ac.kr

**Table S1.** The composition of NH<sub>4</sub>-KFI obtained by SEM-EDX.

| mol/mol % | KFI parent | KFI-SA1 | KFI-SA2 | KFI-SA3 |
|-----------|------------|---------|---------|---------|
| Si        | 27.53      | 27.10   | 29.29   | 25.79   |
| Al        | 5.64       | 5.66    | 6.06    | 5.20    |
| K         | 0.19       | 0.35    | 0.34    | 0.29    |
| Si/Al     | 4.88       | 4.79    | 4.83    | 4.96    |

**Table S2.** The composition of Cu-KFI obtained by ICP-AES.

|                    | Cu-KFI parent | Cu-KFI -SA1 | Cu-KFI-SA2 | Cu-KFI-SA3 |
|--------------------|---------------|-------------|------------|------------|
| K (wt%)            | 0.24          | 0.33        | 0.27       | 0.30       |
| Cu/Al<br>(mol/mol) | 0.20          | 0.20        | 0.20       | 0.20       |

**Table S3.** The Si/Al<sub>f</sub> ratio of NH<sub>4</sub>-KFI, Cu-KFI and Cu-KFI HTA.

|                      | Si/Al <sub>f</sub> ratio |      |      |      |              |
|----------------------|--------------------------|------|------|------|--------------|
|                      | Parent                   | SA1  | SA2  | SA3  | Average      |
| NH <sub>4</sub> -KFI | 4.38                     | 4.57 | 4.42 | 4.28 | 4.41 (±0.10) |
| Cu-KFI               | 6.01                     | 5.41 | 5.64 | 5.77 | 5.71 (±0.22) |
| Cu-KFI<br>HTA        | 7.35                     | 7.53 | 7.37 | 7.37 | 7.41 (±0.07) |

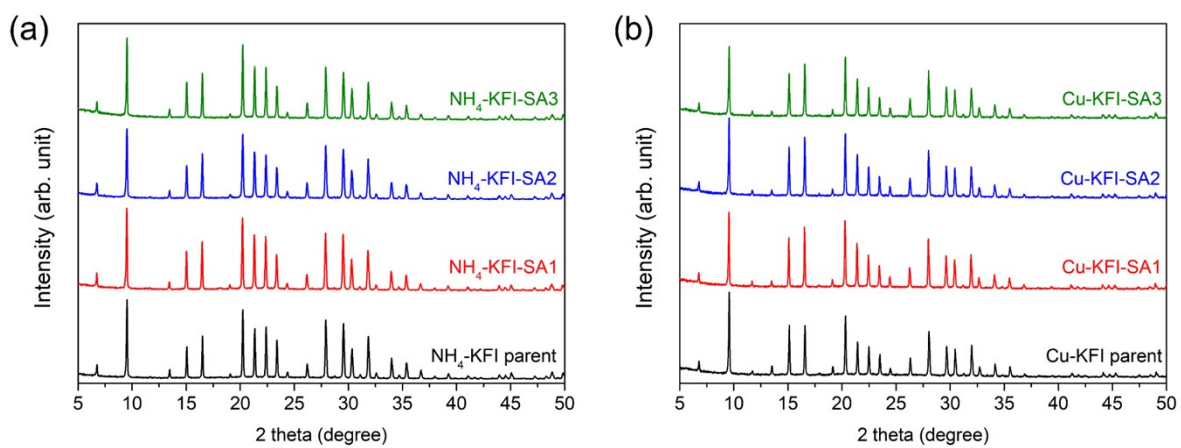

**Fig. S1.** The XRD profiles of (a) NH<sub>4</sub>-KFI and (b) Cu-KFI.

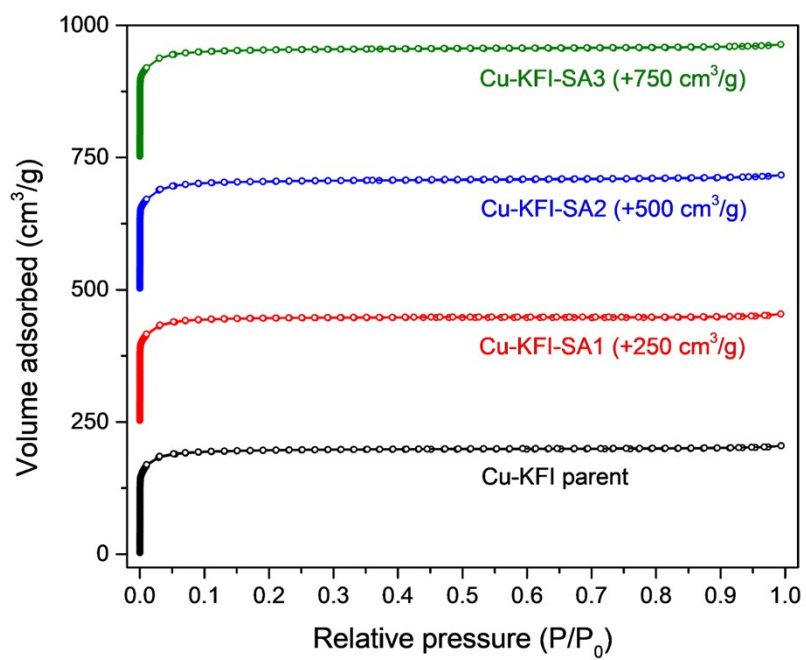

**Fig. S2.** The Ar-BET isotherms of the Cu-KFI.

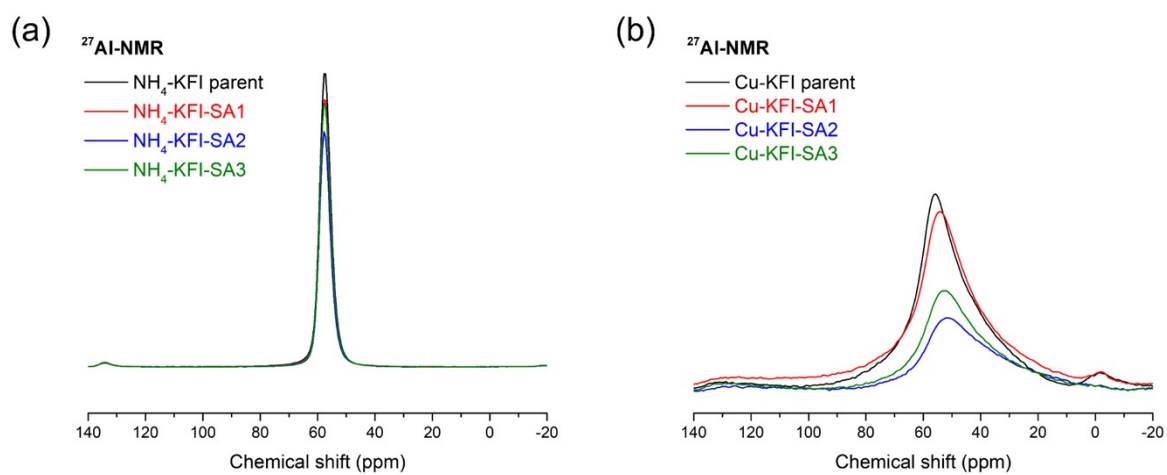

**Fig. S3.**  $^{27}\text{Al-NMR}$  spectra of the (a)  $\text{NH}_4\text{-KFI}$  and (b)  $\text{Cu-KFI}$ .

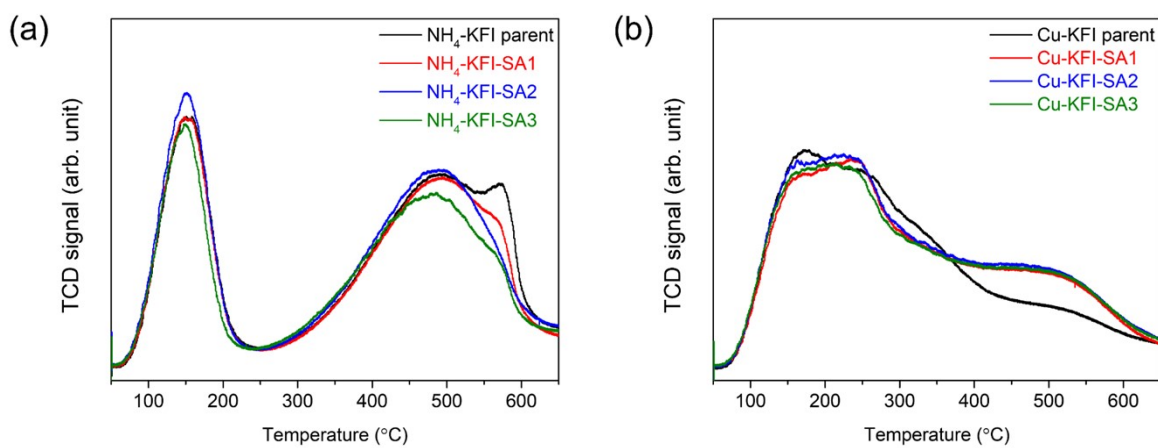

**Fig. S4.** The NH<sub>3</sub>-TPD profiles of the (a) NH<sub>4</sub>-KFI and (b) Cu-KFI.



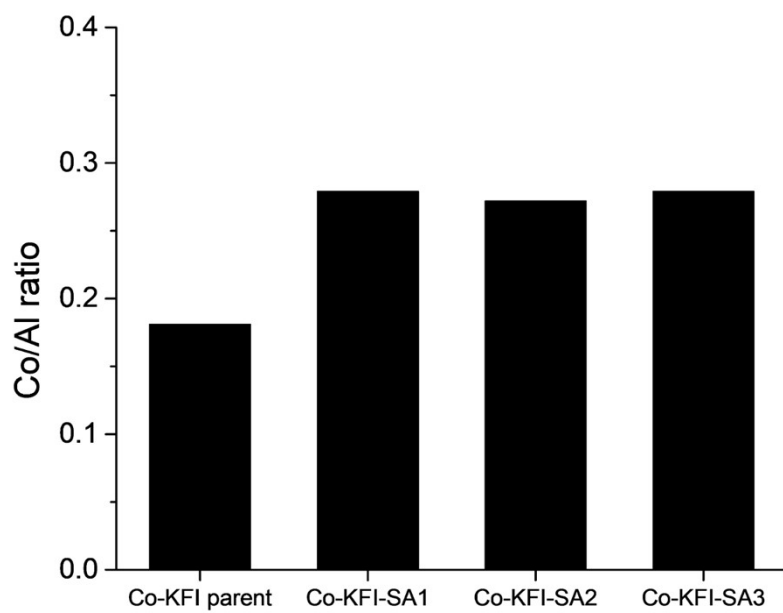

**Fig. S5.** The result of cobalt ions titration for measuring the amount of paired Al sites in the parent and seed added Cu-KFI.

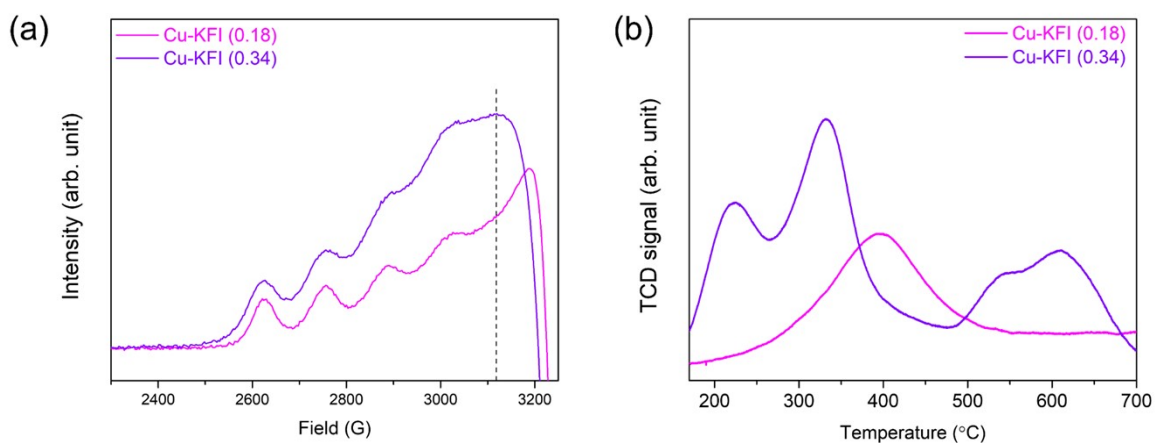

**Fig. S6.** (a) The EPR spectra and (b) H<sub>2</sub>-TPR profiles of Cu-KFI with different loadings.

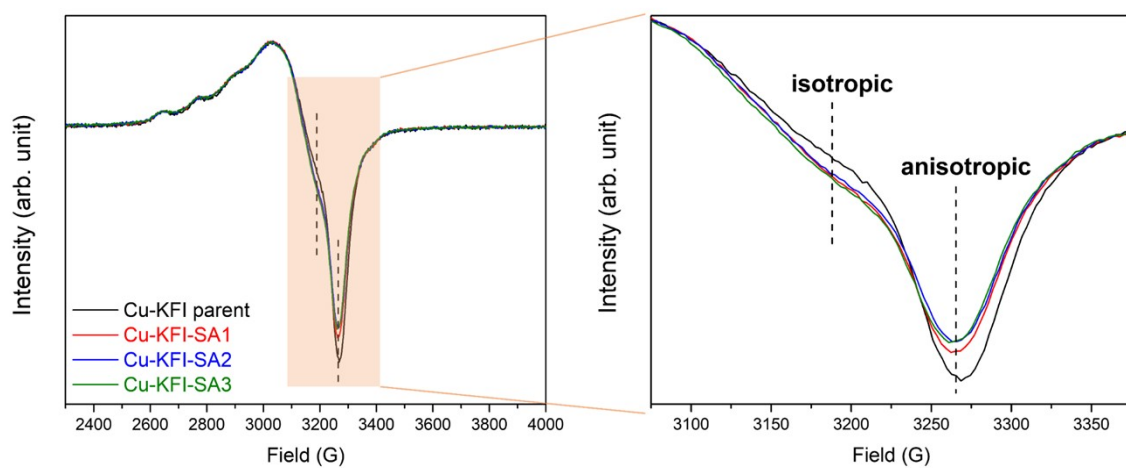

**Fig. S7.** The EPR spectra of Cu-KFI at room temperature.

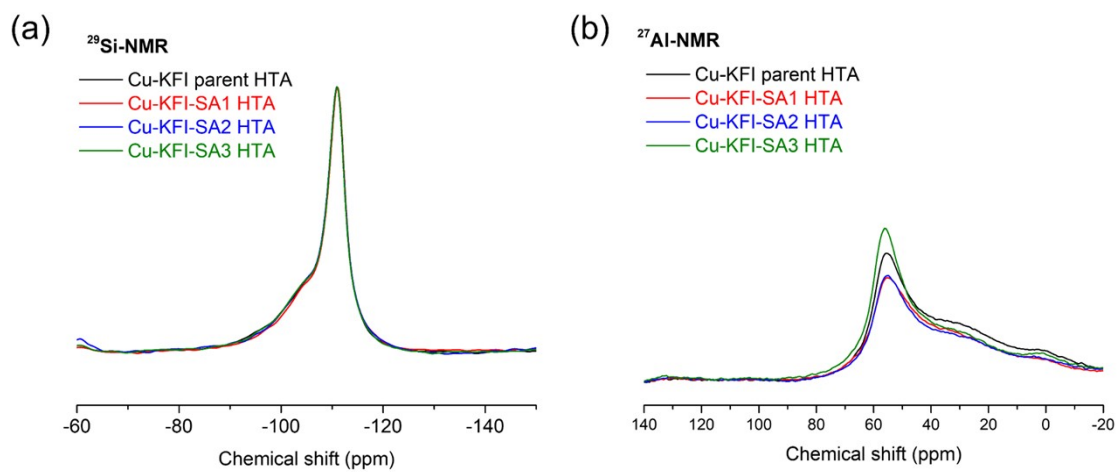

**Fig. S8.** The  $^{29}\text{Si}$  and  $^{27}\text{Al}$ -NMR spectra of hydrothermally aged Cu-KFI catalysts.

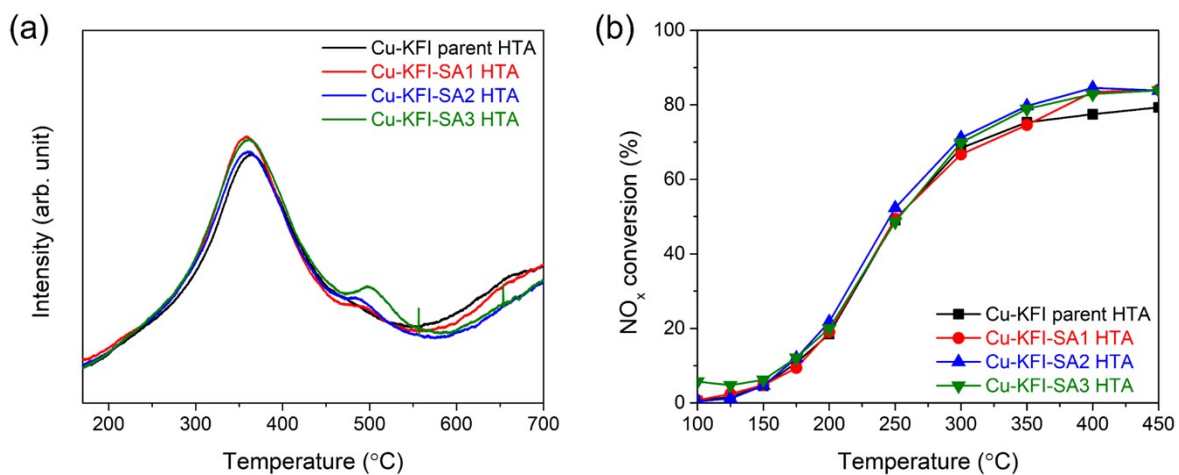

**Fig. S9.** (a) The  $H_2$ -TPR and (b) SCR activity of hydrothermally aged Cu-KFI catalysts.

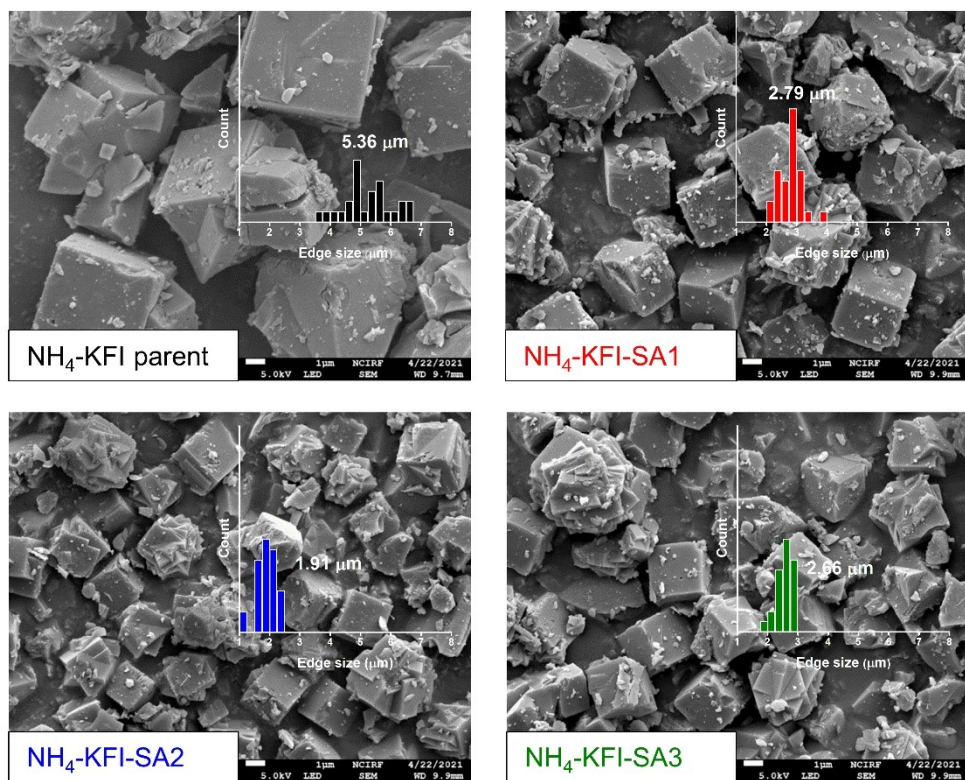

**Fig. S10.** The SEM image of the hydrothermally aged (a) Cu-KFI parent, (b) Cu-KFI-SA1 (c) SA2, and (d) SA3.

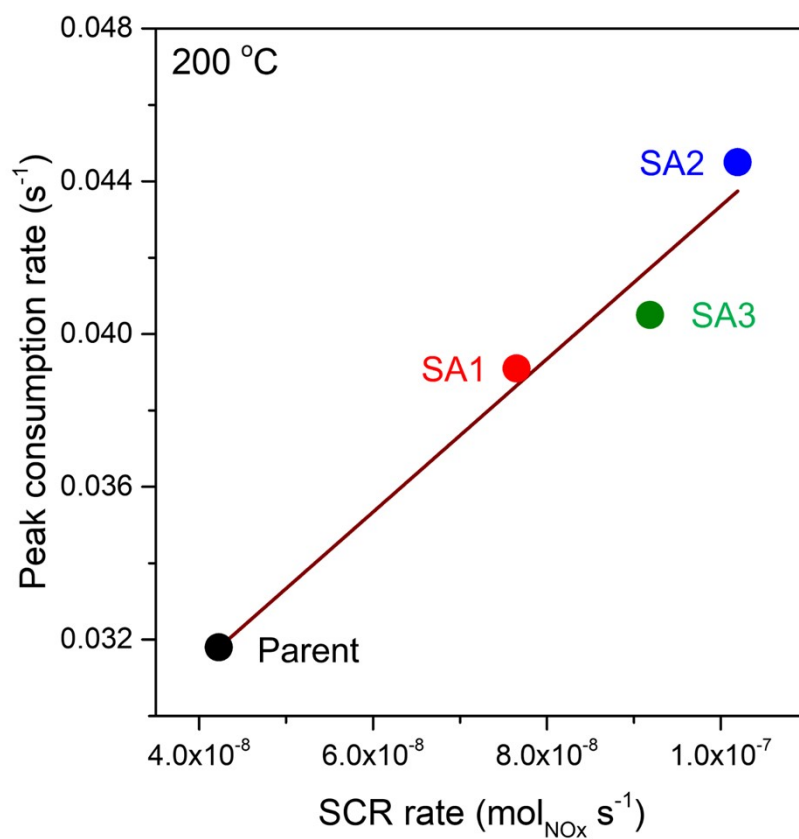

**Fig. S11.** The correlation between the SCR rates in the reaction and peak consumption rates of Lewis NH<sub>3</sub> during DRIFT analysis.

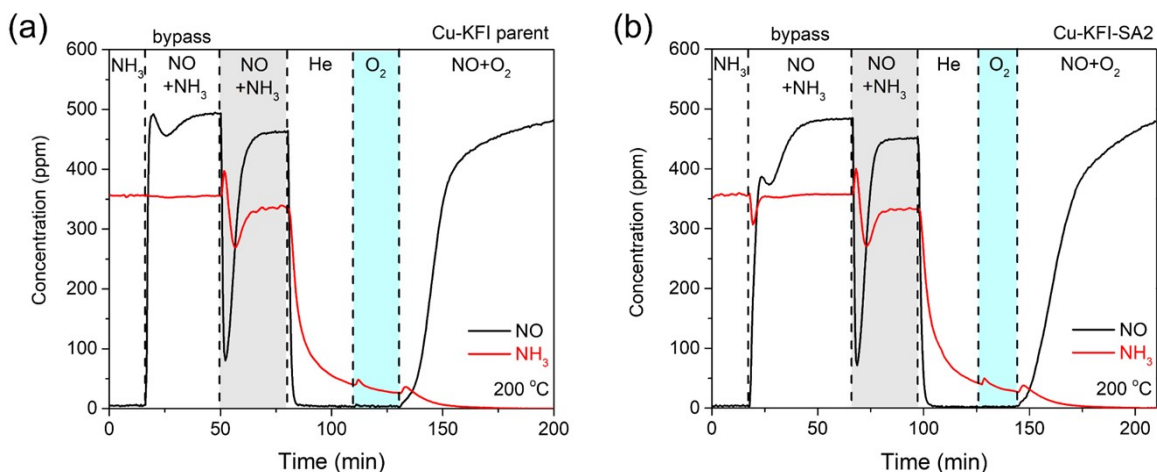

**Fig. S12.** The NO and NH<sub>3</sub> concentration profiles during the simulated SCR protocol at 200 °C. The (a) Cu-KFI parent and (b) Cu-KFI seed #2 catalysts were pretreated under 20% O<sub>2</sub>/He for 30 min, and fully saturated by 350 ppm NH<sub>3</sub>. After confirming the steady-state concentration at bypass, the 500 ppm NO and 350 ppm NH<sub>3</sub> were introduced into the catalysts to reduce the Cu ions (gray box). After purging with He, the reduced catalysts were oxidized with O<sub>2</sub> (sky blue box). Then, the NO was introduced to consume the all adsorbed NH<sub>3</sub>.



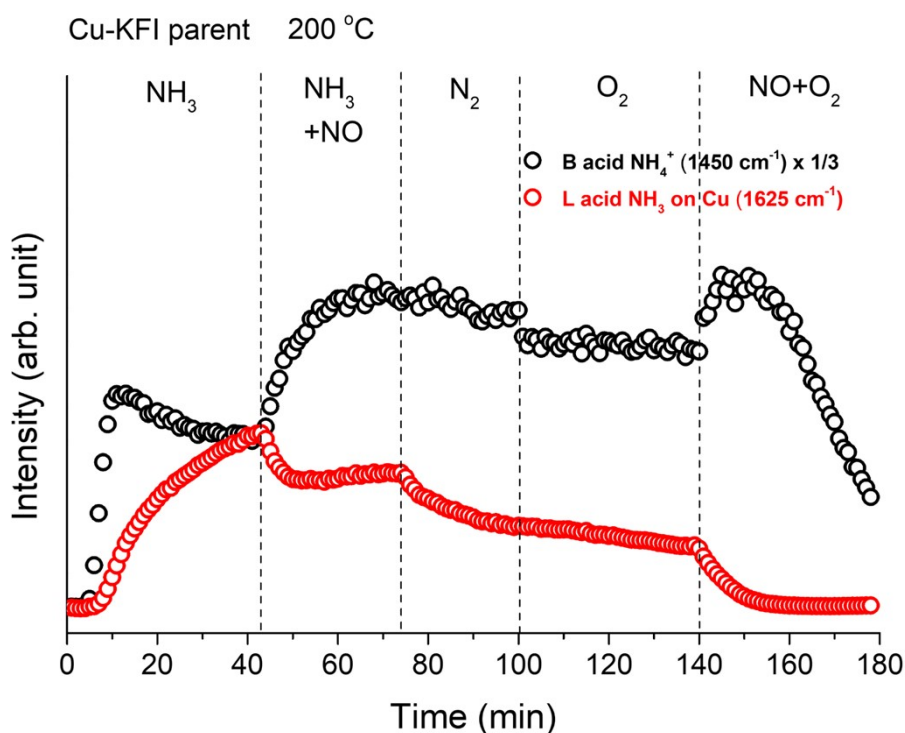

**Fig. S13.** The DRIFTS peak profiles of Brønsted acid  $\text{NH}_4^+$  and Lewis acid  $\text{NH}_3$  in the Cu-KFI parent during the simulated SCR reaction protocol.

In oxidation process (100-140 min), the Brønsted acid  $\text{NH}_4^+$  slightly decreased at initial. The amount of consumed  $\text{NH}_4^+$  was quantified combining the DRIFT and  $\text{NH}_3$ -TPD results in Figure S4. The amount of Brønsted acid sites of Cu-KFI parent is 1.34 mmol/g, which is obtained by deconvoluting the desorption profile in Figure S4. This would correspond to the intensity of B acid  $\text{NH}_4^+$  at 40 min in the DRIFT profile. Therefore, we could estimate the decreased amount of B acid sites at 100 min by following equation.

$$\text{Consumed } \text{NH}_4^+ = \frac{\text{Decreased intensity at 100 min}}{\text{Intensity at 40 min}} \times \text{amount of } \text{NH}_4^+ \text{ on Cu-KFI parent in } \text{NH}_3\text{-TPD}$$

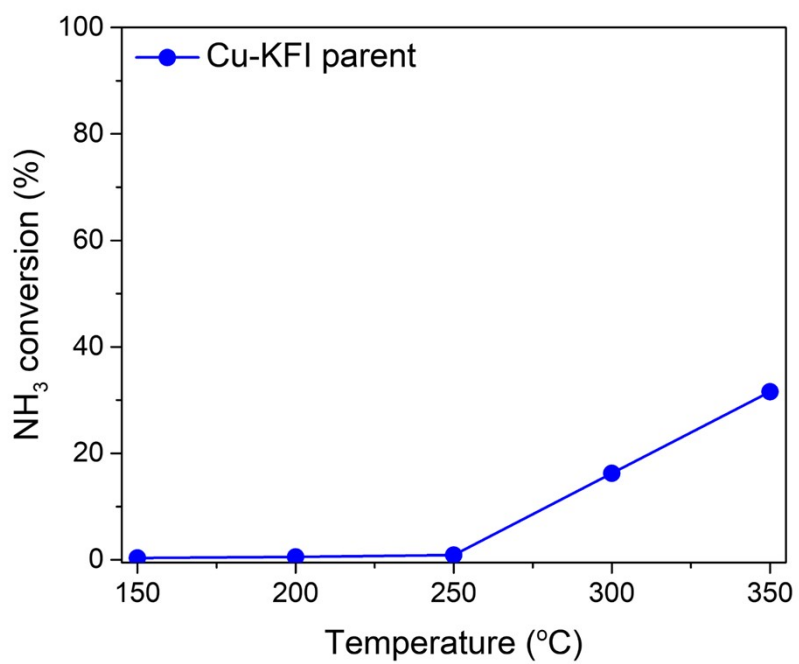

**Fig. S14.** NH<sub>3</sub> oxidation of Cu-KFI parent under 500 ppm NH<sub>3</sub>, 10% O<sub>2</sub> and N<sub>2</sub> balance (GHSV = 240,000 h<sup>-1</sup>).
